# Supplementary material for: Isotopes and otolith chemistry provide insight into the biogeochemical history of mercury in southern flounder across a salinity gradient
Source: Royal Society of Chemistry journal article supplement (doi:10.1039/d3em00482a), 2024-01-01
Supplement: d3em00482a1.pdf [file d3em00482a1.pdf]

## Supplemental Data

### *S1: Data*

| LifetimeResidency | CaptureDate | Cohort | Length | Weight | LifetimeResidency | Bulk δ15N | Relative TP based on bulk | Bulk δ13C | Weighted Mean 15N Source | Estimated TP | Gly  | Leu  | Nor  | Glu  | Phe  | AAA  | Lys | SDGly | SDLeu | SDNor | SDGlu | SDPhe | SDAAA | SDLys | [Hg] dry mg/kg | [Hg] wet mg/kg | δ202         | δ201         | δ200         | δ199         |              |
|-------------------|-------------|--------|--------|--------|-------------------|-----------|---------------------------|-----------|--------------------------|--------------|------|------|------|------|------|------|-----|-------|-------|-------|-------|-------|-------|-------|----------------|----------------|--------------|--------------|--------------|--------------|--------------|
| EF                | 62718       | 2017   | 420    | 940    | EF                | 11.4      | 10.8727674                | -20       | 0.527232603              | 2.456140351  | 7.2  | 15.5 | 18.8 | 18.7 | 6.8  | -5.5 | 4   | 0.76  | 0.17  | 0.2   | 0.11  | 0.51  | 0.06  | 0.23  | 0.17212        | 0.03339128     | -0.32        | -0.06        | -0.11        | 0.15         |              |
| EF                | 71318       | 2017   | 333    | 460    | EF                | 13.6      | 12.70836888               | -21.4     | 0.891631117              | 3.210526316  | 8.9  | 22.4 | 20.1 | 25.2 | 9    | -4.5 | 8.9 | 0.26  | 0.18  | 0.16  | 0.04  | 0.58  | 0.15  | 0.2   | 0.30852        | 0.0555336      | -0.32        | -0.05        | -0.1         | 0.17         |              |
| EF                | 61019       | 2018   | 399    | 733    | EF                | 11.4      | 10.71788732               | -20.8     | 0.682112676              | 2.789473684  | 8.3  | 17.1 | 19.6 | 19.6 | 5.8  | -4.6 | 5.8 | 0.39  | 0.36  | 0.37  | 0.32  | 0.87  | 0.29  | 0.39  | 0.1491         | 0.0345912      | -0.22        | -0.03        | -0.12        | 0.16         |              |
| EF                | 61119       | 2017   | 547    | 1913   | EF                | 13.9      | 13.14464688               | -19.1     | 0.755353122              | 3.315789474  | 7.4  | 21.3 | 19.7 | 23.4 | 6.6  | -4.5 | 8.5 | 0.4   | 0.23  | 0.35  | 0.35  | 0.51  | 0.33  | 0.42  | 0.63682        | 0.13309538     | -0.48        | -0.14        | -0.18        | 0.14         |              |
| EF                | 61319       | 2018   | 341    | 440    | EF                | 11.8      | 11.23207547               | -21.3     | 0.567924528              | 2.98245614   | 7    | 15.5 | 18.5 | 19.1 | 4.2  | -5.2 | 3.5 | 0.1   | 0.36  | 0.16  | 0.05  | 0.64  | 0.52  | 0.2   | 0.15537        | 0.02905419     | -0.23        | -0.05        | -0.06        | 0.22         |              |
| EF                | 71619       | 2018   | 473    | 1308   | EF                | 14.3      | 13.46932667               | -20.6     | 0.830673333              | 3.456140351  | 10.1 | 22.3 | 19.7 | 24.3 | 6.7  | -4.3 | 8.3 | 0.74  | 0.33  | 0.2   | 0.2   | 0.77  | 0.89  | 0.02  | 0.44914        | 0.10285306     | -0.39        | -0.1         | -0.15        | 0.2          |              |
| TF                | 72618       | 2018   | 292    | 297    | TF                | 12.8      | 11.95262136               | -22.8     | 0.847378641              | 2.684210526  | 10.1 | 18.6 | 19.2 | 21.2 | 8    | -5.4 | 6.7 | 0.25  | 0.33  | 0.14  | 0.26  | 0.8   | 0.34  | 0.3   | 0.22399        | 0.04390204     | -0.28        | -0.21        | -0.08        | -0.11        |              |
| TF                | 71519       | 2018   | 455    | 1185   | TF                | 13.6      | 12.80424084               | -19.1     | 0.795759162              | 3.473684211  | 9.9  | 20.9 | 19.8 | 22.9 | 5.2  | -4.8 | 7.4 | 0.2   | 0.31  | 0.08  | 0.22  | 0.46  | 0.14  | 0.15  | 0.33411        | 0.07517475     | -0.29        | -0.04        | -0.13        | 0.23         |              |
| FW                | 61918       | 2017   | 300    | 321    | FW                | 13.1      | 12.15161489               | -28.3     | 0.948385105              | 2.385964912  | 9.6  | 19.6 | 19   | 22.1 | 10.6 | -5.4 | 5.6 | 0.02  | 0.24  | 0.09  | 0.17  | 0.89  | 0.23  | 0.55  | 0.48176        | 0.10309664     | -0.64        | -0.37        | -0.31        | 0.01         |              |
| FW                | 70818       | 2017   | 296    | 280    | FW                | 14.9      | 13.94090171               | -28.6     | 0.959098294              | 3.052631579  | 10.2 | 23.3 | 20.1 | 26.4 | 11.1 | -5.1 | 7.5 | 0.07  | 0.16  | 0.13  | 0.12  | 0.86  | 0.48  | 0.2   | 0.47551        | 0.09700404     | -0.7         | -0.47        | -0.31        | 0            |              |
| FW                | 32119       | 2019   | 262    | 172.7  | FW                | 14.4      | 13.44320197               | -29.1     | 0.95679803               | 2.701754386  | 11   | 20.8 | 19.3 | 23.4 | 10.1 | -5   | 7.3 | 0.27  | 0.11  | 0.27  | 0.1   | 1.04  | 0.3   | 0.39  | 0.34049        | 0.06741702     | -0.5         | -0.36        | -0.25        | 0.02         |              |
| FW                | 51619       | 2018   | 322    | 319    | FW                | 13.8      | 12.8979677                | -30.6     | 0.902032301              | 2.49122807   | 10.7 | 20.2 | 19.4 | 22.5 | 10.4 | -4.5 | 7.7 | 0.16  | 0.09  | 0.01  | 0.21  | 0.51  | 0.36  | 0.1   | 0.28692        | 0.06140088     | -0.46        | -0.25        | -0.22        | 0.1          |              |
| FW                | 52319       | 2018   | 322    | 375    | FW                | 13.7      | 12.74688356               | -26.6     | 0.953116438              | 2.807017544  | 10.2 | 20.8 | 19   | 23.2 | 9.3  | -5   | 8.2 | 0.09  | 0.19  | 0.11  | 0.14  | 0.1   | 0.12  | 0.26  | 0.36399        | 0.07352598     | -0.72        | -0.44        | -0.33        | -0.1         |              |
| FW                | 60219       | 2018   | 368    | 600    | FW                | 12.7      | 11.89078698               | -30.1     | 0.809213016              | 2.456140351  | 9.3  | 19.1 | 19   | 21   | 9.1  | -4.9 | 5.8 | 0.23  | 0.2   | 0.07  | 0.27  | 0.38  | 0.29  | 0.29  | 0.44246        | 0.09203168     | -0.78        | -0.55        | -0.36        | -0.09        |              |
| FW                | 61219       | 2018   | 319    | 413    | FW                | 13.9      | 13.00108635               | -26.9     | 0.898913649              | 3.122807018  | 9.6  | 20.2 | 19   | 22.6 | 6.9  | -3.5 | 7.7 | 0.03  | 0.34  | 0.41  | 0.09  | 0.2   | 0.59  | 0.13  | 0.38399        | 0.07986992     | -0.64        | -0.42        | -0.25        | 0.06         |              |
| FW                | 70619       | 2018   | 333    | 358    | FW                | 12.5      | 11.83589041               | -26.8     | 0.664109589              | 3.385964912  | 8.8  | 19.2 | 18.7 | 21   | 3.8  | -4.2 | 6.4 | 0.36  | 0.55  | 0.3   | 0.33  | 0.61  | 0.47  | 0.18  | 0.37986        | 0.07331298     | -0.49        | -0.31        | -0.2         | 0.13         |              |
| EF                | 62618       | 2018   | 270    | 211.28 | EF                | 12.2      | 11.38                     | -23.3     | 0.82                     |              |      |      |      |      |      |      |     |       |       |       |       |       |       |       | 0.5369         | 0.0977158      | -0.614409897 | -0.606538184 | -0.25021153  | -0.29070827  |              |
| TF                | 61818       | 2017   | 375    | 556    | TF                | 13.5      | 12.68                     | -26.7     | 0.82                     |              |      |      |      |      |      |      |     |       |       |       |       |       |       |       |                | 0.3682         | 0.0692216    | -0.692462472 | -0.360464003 | -0.274854703 | 0.04268121   |
| TF                | 60319       | 2018   | 411    | 780    | TF                | 11.8      | 10.98                     | -26.1     | 0.82                     |              |      |      |      |      |      |      |     |       |       |       |       |       |       |       |                | 0.2732         | 0.0568256    | -0.86470172  | -0.502133783 | -0.506955006 | -0.132464029 |
| TF                | 60419       | 2018   | 365    | 570    | TF                | 11.2      | 10.38                     | -28.1     | 0.82                     |              |      |      |      |      |      |      |     |       |       |       |       |       |       |       |                | 0.2451         | 0.0519612    | -0.698590719 | -0.457944071 | -0.360085978 | -0.050380939 |
| TF                | 61119       | 2018   | 439    | 987    | TF                | 13.8      | 12.98                     | -19.4     | 0.82                     |              |      |      |      |      |      |      |     |       |       |       |       |       |       |       |                | 0.282          | 0.060912     | -0.315552691 | -0.112115062 | -0.117439302 | 0.250136182  |
| TF                | 61119       | 2018   | 372    | 583    | TF                | 11.9      | 11.08                     | -18.5     | 0.82                     |              |      |      |      |      |      |      |     |       |       |       |       |       |       |       |                | 0.2531         | 0.0516324    | -0.642295496 | -0.200606243 | -0.341461032 | 0.185527767  |
| TF                | 73019       | 2018   | 390    | 781    | TF                | 12.3      | 11.48                     | -21.1     | 0.82                     |              |      |      |      |      |      |      |     |       |       |       |       |       |       |       |                | 0.2671         | 0.0552897    | -0.64133598  | -0.309703089 | -0.335627293 | 0.039714647  |
